# Supplementary material
Source: PubMed Central journal article supplement (PMC5453640)
Supplement: NIHMS860897-supplement-Supplemental_1.pdf [file NIHMS860897-supplement-Supplemental_1.pdf]

Supporting information

**Nanomolar-potency aminophenyl-1,3,5-triazine activators of the cystic fibrosis transmembrane conductance regulator (CFTR) chloride channel activators for pro-secretory therapy of dry eye diseases**

Sujin Lee, Puay-Wah Phuan, Christian M. Felix, Marc H. Levin and Alan S. Verkman\*

Departments of Medicine and Physiology, University of California, San Francisco, CA, USA

Contents

|                                                                                          |        |
|------------------------------------------------------------------------------------------|--------|
| 1. Analytical data of synthetic compounds ( <b>6a-k</b> , <b>7a-7g</b> , and <b>11</b> ) | S2-S5  |
| 2. Supplementary Table 1                                                                 | S6-S14 |

## EXPERIMENTAL SECTION

All final analogs (**6a-6g**, **7a-7k**, and **11**) were prepared by same method described for **1** with various substituted anilines and precursors.

3-({4-(Diethylamino)-6-[(1,1,1,3,3,3-hexafluoropropan-2-yl)oxy]-1,3,5-triazin-2-yl}amino)benzoic acid (**6a**) : Purified by flash chromatography (1:6 EtOAc/Hex) to afford **6a** as a white powder (56%).

<sup>1</sup>H NMR (300 MHz, acetone-*d*6): δ = 9.0 (brs, 1H), 8.79 (brs, 1H), 7.90 (d, 1H, *J* = 8.1 Hz), 7.76 (dt, 1H, *J* = 1.3, 7.9 Hz), 7.48 (t, 1H, *J* = 7.9 Hz), 6.79 (quint, 1H, *J* = 6.4 Hz), 3.78-3.66 (m, 4H), 1.29-1.20 (m, 6H); <sup>13</sup>C NMR (75 MHz, acetone-*d*6): δ = 168.6, 166.8, 165.3, 139.6, 131.1, 128.7, 124.2, 123.9, 123.1, 121.2, 119.3, 68.9, 68.5, 68.0, 67.6, 67.1 (quint, 34 Hz), 42.1, 41.6, 12.35, 12.32; HRMS (ESI): *m/z* calculated for C<sub>17</sub>H<sub>18</sub>F<sub>6</sub>N<sub>5</sub>O<sub>3</sub> [M + H<sup>+</sup>]: 454.1309. Found: 454.1311.

*N,N*-Diethyl-*N'*-(3-fluorophenyl)-6-[(1,1,1,3,3,3-hexafluoropropan-2-yl)oxy]-1,3,5-triazine-2,4-diamine (**6b**) : Purified by flash chromatography (1:10 EtOAc/Hex) to afford **6b** as a white powder (70%).

<sup>1</sup>H NMR (300 MHz, CDCl<sub>3</sub>): δ = 7.69 (m, 1H), 7.48 (brs, 1H), 7.26 (m, 1H), 7.11 (d, 1H, *J* = 7.9 Hz), 6.79 (td, 1H, *J* = 8.2, 2.5 Hz), 6.31 (dt, 1H, *J* = 12.4, 6.3 Hz), 3.64 (m, 4H), 1.25 (m, 6H); <sup>13</sup>C NMR (75 MHz, CDCl<sub>3</sub>): δ = 168.5, 165.1, 164.8, 164.6, 161.3, 140.1, 139.9, 129.8, 129.7, 122.7, 118.9, 115.1, 110.0, 109.7, 107.6, 107.2, 68.8, 68.4, 67.9 (t, 34 Hz), 42.6, 42.2, 12.8, 12.7; HRMS (ESI): *m/z* calculated for C<sub>16</sub>H<sub>17</sub>F<sub>7</sub>N<sub>5</sub>O [M + H<sup>+</sup>]: 428.1316. Found: 428.1316.

*N,N*-Diethyl-*N'*-(3-chlorophenyl)-6-[(1,1,1,3,3,3-hexafluoropropan-2-yl)oxy]-1,3,5-triazine-2,4-diamine (**6c**) : Purified by flash chromatography (1:10 EtOAc/Hex) to afford **6c** as a white powder (47%).

<sup>1</sup>H NMR (300 MHz, CDCl<sub>3</sub>): δ = 7.98 (brs, 1H), 7.28-7.05 (m, 4H), 6.31 (quint, 1H, *J* = 6.3 Hz), 3.64 (sex, 4H, *J* = 7.0 Hz), 1.30 (t, 3H, *J* = 7.1 Hz), 1.23 (t, 3H, *J* = 7.1 Hz); <sup>13</sup>C NMR (75 MHz, CDCl<sub>3</sub>): δ = 168.5, 165.1, 164.7, 139.5, 134.5, 129.7, 123.2, 122.6, 120.1, 118.9, 117.6, 68.9, 68.4, 68.0 (t, 32 Hz), 42.6, 42.2, 12.9, 12.8; HRMS (ESI): *m/z* calculated for C<sub>16</sub>H<sub>17</sub>ClF<sub>6</sub>N<sub>5</sub>O [M + H<sup>+</sup>]: 444.1021. Found: 444.1021.

*N,N*-Diethyl-6-[(1,1,1,3,3,3-hexafluoropropan-2-yl)oxy]-*N'*-(3-nitrophenyl)-1,3,5-triazine-2,4-diamine (**6d**)

: Yellowish powder, 49% yield. <sup>1</sup>H NMR (300 MHz, CDCl<sub>3</sub>): δ = 9.15 (brs, 1H), 8.23-7.74 (m, 2H), 7.70-7.34 (1m, 2H), 6.31 (quint, 1H, *J* = 6.2 Hz), 3.74 (q, 2H, *J* = 6.9 Hz), 3.63 (q, 2H, *J* = 7.0 Hz), 1.89 (brs, 1H), 1.33 (t, 3H, *J* = 7.1 Hz), 1.24 (t, 4H, *J* = 7.1 Hz); <sup>13</sup>C NMR (75 MHz, CDCl<sub>3</sub>): δ = 168.4, 164.79, 164.75, 148.6, 139.7, 129.3, 124.9, 124.1, 121.8, 119.6, 117.3 (q, 168 Hz), 117.8, 114.8, 69.0, 68.7, 68.5, 68.2, 67.9 (quint, 20 Hz), 42.9, 42.4, 12.8, 12.7; HRMS (ESI): *m/z* calculated for C<sub>16</sub>H<sub>17</sub>F<sub>6</sub>N<sub>6</sub>O<sub>3</sub> [M + H<sup>+</sup>]: 455.1261. Found: 455.1263.

4-({4-(Diethylamino)-6-[(1,1,1,3,3,3-hexafluoropropan-2-yl)oxy]-1,3,5-triazin-2-yl}amino)benzoic acid (**6e**) : Purified by flash chromatography (1:10 EtOAc/Hex) to afford **6e** as a white powder (56%).

<sup>1</sup>H NMR (300 MHz, acetone-*d*6): δ = 9.12 (brs, 1H), 8.05-7.89 (m, 4H), 6.80 (quint, 1H, *J* = 6.4 Hz), 3.72 (quint, 4H, *J* = 7.2 Hz), 1.31-1.18 (m, 6H); <sup>13</sup>C NMR (75 MHz, acetone-*d*6): δ = 168.7, 166.7, 165.3, 143.6, 143.5, 130.5, 124.8, 119.1, 119.0, 68.6, 67.7, 42.1, 41.7, 12.3, 12.2; HRMS (ESI): *m/z* calculated for C<sub>17</sub>H<sub>18</sub>F<sub>6</sub>N<sub>5</sub>O<sub>3</sub> [M + H<sup>+</sup>]: 454.1309. Found: 454.1308.

*N,N*-Diethyl-*N'*-(4-fluorophenyl)-6-[(1,1,1,3,3,3-hexafluoropropan-2-yl)oxy]-1,3,5-triazine-2,4-diamine (**6f**)  
: Purified by flash chromatography (1:10 EtOAc/Hex) to afford **6f** as a white powder (62%).

<sup>1</sup>H NMR (300 MHz, CDCl<sub>3</sub>): δ = 7.55-7.50 (m, 2H), 7.25 (brs, 1H), 7.08-7.01 (m, 2H), 6.32 (quint, 1H, *J* = 6.3 Hz), 3.61 (dq, 4H, *J* = 3.1, 7.9 Hz), 1.23 (q, 6H, *J* = 7.2 Hz); <sup>13</sup>C NMR (75 MHz, CDCl<sub>3</sub>): δ = 168.5, 165.1, 160.6, 134.2, 122.7, 122.2, 122.1, 118.9, 115.5, 115.2, 68.8, 68.3, 67.9 (t, 34 Hz), 42.3, 42.0, 12.9, 12.8; HRMS (ESI): *m/z* calculated for C<sub>16</sub>H<sub>17</sub>F<sub>7</sub>N<sub>5</sub>O [M + H<sup>+</sup>]: 428.1316. Found: 428.1319.

*N,N*-Diethyl-6-[(1,1,1,3,3,3-hexafluoropropan-2-yl)oxy]-*N'*-(4-nitrophenyl)-1,3,5-triazine-2,4-diamine (**6g**)  
: Purified by flash chromatography (1:10 EtOAc/Hex) to afford **6g** as a yellowish powder (55%).

<sup>1</sup>H NMR (300 MHz, CDCl<sub>3</sub>): δ = 8.37 (brs, 1H), 8.24-8.19 (m, 2H), 7.84-7.79 (m, 2H), 6.33 (quint, 1H, *J* = 6.2 Hz), 3.71-3.60 (m, 4H), 1.30 (t, 3H, *J* = 7.1 Hz), 1.23 (t, 3H, *J* = 7.1 Hz); <sup>13</sup>C NMR (75 MHz, CDCl<sub>3</sub>): δ = 168.5, 164.9, 164.8, 144.7, 142.7, 124.8, 119.2, 126.3, 122.6, 118.8, 115.1 (q, 281 Hz), 69.4, 69.0, 68.5, 68.0, 67.6 (quint, 34 Hz), 42.7, 42.4, 12.79, 12.76; HRMS (ESI): *m/z* calculated for C<sub>16</sub>H<sub>17</sub>F<sub>6</sub>N<sub>6</sub>O<sub>3</sub> [M + H<sup>+</sup>]: 455.1261. Found: 455.1264.

*N,N*-Diethyl-6-[(1,1,1,3,3,3-hexafluoropropan-2-yl)oxy]-*N'*-(1*H*-indazol-6-yl)-1,3,5-triazine-2,4-diamine (**6h**)  
: Purified by flash chromatography (1:6 EtOAc/Hex) to afford **6h** as a white powder (28%).

<sup>1</sup>H NMR (300 MHz, acetone-*d*<sub>6</sub>): δ = 8.96 (brs, 1H), 8.38 (brs, 1H), 7.97 (d, 1H, *J* = 1.05 Hz), 7.71 (dd, 1H, *J* = 0.7, 8.7 Hz), 7.34 (dd, 1H, *J* = 1.8, 8.7 Hz), 6.79 (quint, 1H, *J* = 6.5 Hz), 3.79 (m, 4H), 1.32-1.21 (m, 6H); <sup>13</sup>C NMR (75 MHz, acetone-*d*<sub>6</sub>): δ = 168.6, 165.3, 162.8, 140.9, 137.7, 133.5, 126.9, 123.1, 120.4, 119.5, 115.3, 68.0, 42.1, 41.6, 12.4, 12.2; HRMS (ESI): *m/z* calculated for C<sub>17</sub>H<sub>18</sub>F<sub>6</sub>N<sub>7</sub>O [M + H<sup>+</sup>]: 450.1472. Found: 450.1475.

*N,N*-Diethyl-6-[(1,1,1,3,3,3-hexafluoropropan-2-yl)oxy]-*N'*-(1*H*-indazol-5-yl)-1,3,5-triazine-2,4-diamine (**6i**)  
: Purified by flash chromatography (1:6 EtOAc/Hex) to afford **6i** as a white powder (28%).

<sup>1</sup>H NMR (300 MHz, acetone-*d*<sub>6</sub>): δ = 12.22 (brs, 1H), 8.85 (brs, 1H), 8.29 (brs, 1H), 8.03 (d, 1H, *J* = 1.0 Hz), 7.67 (d, 1H, *J* = 8.9 Hz), 7.57 (d, 1H, *J* = 8.9 Hz), 6.79 (quint, 1H, *J* = 6.5 Hz), 3.68 (q, 4H, *J* = 7.0 Hz), 1.28-1.17 (m, 6H); <sup>13</sup>C NMR (75 MHz, acetone-*d*<sub>6</sub>): δ = 168.6, 165.4, 165.3, 137.5, 133.6, 132.3, 131.5, 123.4, 121.8, 126.9, 123.2, 123.1, 119.46, 119.43, 115.6 (q, 281 Hz), 113.3, 111.1, 109.8, 68.4, 68.0, 67.5 (t, 34 Hz), 42.0, 41.5, 12.4, 12.3; HRMS (ESI): *m/z* calculated for C<sub>17</sub>H<sub>18</sub>F<sub>6</sub>N<sub>7</sub>O [M + H<sup>+</sup>]: 450.1472. Found: 450.1472.

*N'*-(1,3-Benzoxazol-6-yl)-*N,N*-diethyl-6-[(1,1,1,3,3,3-hexafluoropropan-2-yl)oxy]-1,3,5-triazine-2,4-diamine (**6j**)  
: Purified by flash chromatography (1:8 EtOAc/Hex) to afford **6j** as a purple powder (25%).

<sup>1</sup>H NMR (300 MHz, acetone-*d*<sub>6</sub>): δ = 9.08 (brs, 1H), 8.46 (brs, 1H), 8.39 (s, 1H), 7.70 (d, 1H, *J* = 8.6 Hz), 7.63 (dd, 1H, *J* = 1.9, 8.6 Hz), 6.80 (quint, 1H, *J* = 6.8 Hz), 3.76-3.67 (m, 4H), 1.31-1.18 (m, 6H); <sup>13</sup>C NMR (75 MHz, CDCl<sub>3</sub>): δ = 168.6, 165.3, 153.0, 150.2, 137.5, 135.7, 119.7, 117.6, 105.6, 102.6, 68.1, 42.1, 41.7, 12.3, 12.2; HRMS (ESI): *m/z* calculated for C<sub>17</sub>H<sub>17</sub>F<sub>6</sub>N<sub>6</sub>O<sub>2</sub> [M + H<sup>+</sup>]: 451.1312. Found: 451.1313.

*N'*-(1,3-Benzothiazol-6-yl)-*N,N*-diethyl-6-[(1,1,1,3,3,3-hexafluoropropan-2-yl)oxy]-1,3,5-triazine-2,4-diamine (**6k**)

: Purified by flash chromatography (1:7 EtOAc/Hex) to afford **6k** as a white powder (40%).

<sup>1</sup>H NMR (300 MHz, CDCl<sub>3</sub>): δ = 8.93 (brs, 1H), 8.47 (brs, 1H), 8.02 (d, 1H, *J* = 8.5 Hz), 7.52 (dd, 2H, *J* = 8.8, 2.2 Hz), 6.30 (m, 1H), 3.66 (m, 4H), 1.27 (m, 6H); <sup>13</sup>C NMR (75 MHz, CDCl<sub>3</sub>): δ = 168.5, 164.5, 152.9, 149.6, 136.0, 134.7, 123.5, 121.9, 119.8, 119.6, 112.7, 97.3, 68.9, 68.7, 68.4, 42.7, 42.3, 12.9, 12.8; HRMS (ESI): *m/z* calculated for C<sub>17</sub>H<sub>17</sub>F<sub>6</sub>N<sub>6</sub>OS [M + H<sup>+</sup>]: 467.1083. Found: 467.1089.

*N,N*-Diethyl-*N'*-phenyl-6-(2,2,3,3-tetrafluoropropoxy)-1,3,5-triazine-2,4-diamine (**7a**)

: Purified by flash chromatography (1:10 EtOAc/Hex) to afford **7a** as a white powder (38%).

<sup>1</sup>H NMR (300 MHz, CDCl<sub>3</sub>): δ = 7.60 (d, 2H, *J* = 8.4 Hz), 7.34 (t, 2H, *J* = 7.4 Hz), 7.08 (t, 1H, *J* = 7.3 Hz), 6.06 (tt, 1H, *J* = 4.9, 53.0 Hz), 3.68-3.59 (m, 2H), 4.78-4.70 (m, 4H), 1.28-1.20 (m, 6H); <sup>13</sup>C NMR (75 MHz, CDCl<sub>3</sub>): δ = 169.2, 165.2, 164.8, 138.6, 128.7, 123.1, 120.0, 114.4 (t, 26 Hz), 112.3 (t, 34 Hz), 109.0 (t, 34 Hz), 105.7 (t, 34 Hz), 62.1 (t, 30 Hz), 42.1, 41.7, 13.1, 12.9; HRMS (ESI): *m/z* calculated for C<sub>16</sub>H<sub>20</sub>F<sub>4</sub>N<sub>5</sub>O [M + H<sup>+</sup>]: 374.1599. Found: 374.1597.

3-{[4-(Diethylamino)-6-(2,2,3,3-tetrafluoropropoxy)-1,3,5-triazin-2-yl]amino}benzoic acid (**7b**)

: Purified by flash chromatography (1:5 EtOAc/Hex) to afford **7b** as a white powder (60%).

<sup>1</sup>H NMR (300 MHz, acetone-*d*<sub>6</sub>): δ = 8.68 (brs, 1H), 7.92 (m, 1H), 7.74-7.71 (m, 1H), 7.46 (t, 1H, *J* = 7.8 Hz), 6.45 (tt, 1H, *J* = 4.9, 53 Hz), 4.91-4.82 (m, 2H), 3.74-3.65 (m, 4H), 1.28-1.18 (m, 6H); <sup>13</sup>C NMR (75 MHz, acetone-*d*<sub>6</sub>): δ = 169.6, 166.9, 165.5, 140.1, 138.1, 131.2, 128.5, 123.8, 123.5, 120.9, 110.0, 61.7, 41.8, 41.4, 12.4; HRMS (ESI): *m/z* calculated for C<sub>17</sub>H<sub>20</sub>F<sub>4</sub>N<sub>5</sub>O<sub>3</sub> [M + H<sup>+</sup>]: 418.1497. Found: 418.1501.

*N,N*-Diethyl-*N'*-(3-fluorophenyl)-6-(2,2,3,3-tetrafluoropropoxy)-1,3,5-triazine-2,4-diamine (**7c**)

: Purified by flash chromatography (1:10 EtOAc/Hex) to afford **7c** as a white powder (40%).

<sup>1</sup>H NMR (300 MHz, CDCl<sub>3</sub>): δ = 7.73 (dt, 1H, *J* = 2.1, 7.7 Hz), 7.37 (brs, 1H), 7.26 (td, 1H, *J* = 6.3, 8.2 Hz), 7.12 (ddd, 1H, *J* = 0.9, 2.0, 8.2 Hz), 6.76 (ddt, 1H, *J* = 0.9, 2.5, 8.2 Hz), 6.02 (tt, 1H, *J* = 4.9, 53 Hz), 4.74 (tt, 2H, *J* = 1.6, 12.4 Hz), 3.64 (sex, 4H, *J* = 7.0 Hz), 1.23 (m, 6H); <sup>13</sup>C NMR (75 MHz, CDCl<sub>3</sub>): δ = 169.2, 165.2, 164.8, 164.6, 161.4, 140.4, 140.3, 129.8, 129.7, 114.9, 114.9, 114.7, 114.3, 114.0, 112.7, 112.3, 111.0, 109.7, 109.47, 109.42, 109.0, 108.5, 107.3, 107.0, 105.7, 62.5, 62.1, 61.7, 42.3, 41.9, 13.0, 12.8; HRMS (ESI): *m/z* calculated for C<sub>16</sub>H<sub>19</sub>F<sub>5</sub>N<sub>5</sub>O [M + H<sup>+</sup>]: 392.1505. Found: 392.1505.

*N'*-(3-Chlorophenyl)-*N,N*-diethyl-6-(2,2,3,3-tetrafluoropropoxy)-1,3,5-triazine-2,4-diamine (**7d**)

: Purified by flash chromatography (1:10 EtOAc/Hex) to afford **7d** as a white powder (81%).

<sup>1</sup>H NMR (300 MHz, CDCl<sub>3</sub>): δ = 7.99 (brs, 1H), 7.25 (m, 3H), 7.04 (dt, 1H, *J* = 7.0, 2.0 Hz), 6.02 (t, 1H, *J* = 4.9 Hz), 4.73 (t, 2H, *J* = 12.3 Hz), 3.64 (m, 4H), 1.84 (brs, 1H), 1.25 (m, 6H); <sup>13</sup>C NMR (75 MHz, CDCl<sub>3</sub>): δ = 169.2, 165.2, 164.7, 139.9, 134.5, 129.6, 122.9, 120.0, 117.6, 114.5, 114.3, 114.1, 112.3, 111.3, 111.0, 110.7, 109.3, 109.0, 108.8, 107.3, 107.0, 106.8, 62.4, 62.1, 61.9, 42.4, 42.0, 13.0, 12.9; HRMS (ESI): *m/z* calculated for C<sub>16</sub>H<sub>19</sub>ClF<sub>4</sub>N<sub>4</sub>O [M + H<sup>+</sup>]: 408.1209. Found: 408.1210.

*N,N*-Diethyl-*N'*-(3-nitrophenyl)-6-(2,2,3,3-tetrafluoropropoxy)-1,3,5-triazine-2,4-diamine (**7e**)

: Purified by flash chromatography (1:10 EtOAc/Hex) to afford **7e** as a yellowish powder (61%).

<sup>1</sup>H NMR (300 MHz, CDCl<sub>3</sub>): δ = 9.12 (brs, 1H), 8.15 (brs, 1H), 7.90 (dd, 1H, *J* = 8.2, 1.6 Hz), 7.57 (d, 1H, *J* = 7.6 Hz), 7.44 (t, 1H, *J* = 8.0 Hz), 5.96 (m, 1H), 4.75 (t, 2H, *J* = 12.6 Hz), 3.72 (q, 2H, *J* = 6.9 Hz), 3.65 (q, 2H, *J* = 6.9 Hz), 2.12 (brs, 1H), 1.31 (t, 3H, *J* = 7.1 Hz), 1.24 (t, 3H, *J* = 7.1 Hz); <sup>13</sup>C NMR (75 MHz, CDCl<sub>3</sub>): δ =

169.1, 164.9, 164.7, 148.6, 140.1, 129.2, 124.8, 117.4, 116.2, 114.6, 114.5, 114.2, 114.0, 112.3, 111.3, 111.0, 110.7, 109.3, 109.0, 108.7, 107.3, 107.0, 106.7, 62.3, 62.1, 61.8, 42.6, 42.1, 12.9, 12.8; HRMS (ESI):  $m/z$  calculated for  $C_{16}H_{19}F_4N_6O_3$  [ $M + H^+$ ]: 419.1450. Found: 419.1449.

4-({4-(Diethylamino)-6-[(2,2,3,3-tetrafluoropropoxy]-1,3,5-triazin-2-yl)amino}benzoic acid (**7f**)

: Purified by flash chromatography (1:10 EtOAc/Hex) to afford **7f** as a white powder (37%).

$^1H$  NMR (300 MHz, acetone-*d*6):  $\delta$  = 8.97 (brs, 1H), 8.04-7.96 (m, 4H), 6.45 (tt, 1H,  $J$  = 5.1, 52 Hz), 4.88 (t, 2H,  $J$  = 13.5 Hz), 3.74-3.64 (m, 4H), 1.29-1.19 (m, 6H);  $^{13}C$  NMR (75 MHz, acetone-*d*6):  $\delta$  = 169.7, 166.4, 165.5, 165.4, 144.2, 130.5, 124.0, 118.8, 109.6, 109.1, 62.1, 61.7, 61.4, 41.8, 41.5, 12.4, 12.3; HRMS (ESI):  $m/z$  calculated for  $C_{17}H_{20}F_4N_5O_3$  [ $M + H^+$ ]: 418.1497. Found: 418.1499.

*N,N*-Diethyl-*N'*-(4-fluorophenyl)-6-(2,2,3,3-tetrafluoropropoxy)-1,3,5-triazine-2,4-diamine (**7g**)

: Purified by flash chromatography (1:10 EtOAc/Hex) to afford **7g** as a white powder (72%).

$^1H$  NMR (300 MHz,  $CDCl_3$ ):  $\delta$  = 7.53 (m, 2H), 7.36 (brs, 1H), 7.02 (m, 2H), 6.03 (m, 1H), 4.73 (m, 2H), 3.61 (m, 4H), 1.24 (m, 6H);  $^{13}C$  NMR (75 MHz,  $CDCl_3$ ):  $\delta$  = 169.1, 164.6, 159.8, 157.9, 142.3, 134.5, 131.2, 125.5, 121.9, 118.7, 115.4, 115.2, 114.3, 112.3, 111.2, 111.0, 110.7, 110.07, 109.2, 109.0, 108.7, 107.3, 107.0, 106.7, 62.7, 62.3, 62.1, 61.8, 42.1, 41.8, 29.6, 13.0, 12.8, 12.7; HRMS (ESI):  $m/z$  calculated for  $C_{16}H_{19}F_5N_5O$  [ $M + H^+$ ]: 392.1505. Found: 392.1503.

*N*-Methyl-*N'*-phenyl-6-[(1,1,1,3,3,3-hexafluoropropan-2-yl)oxy]-1,3,5-triazine-2,4-diamine **11**

To a solution of **9** (80 mg, 0.26 mmol) in THF (3 ml) was added diisopropylethylamine (0.09 ml, 0.51 mmol) and aniline (0.03 ml, 0.31 mmol). The mixture was refluxed for 16 h. After cooling to room temperature the reaction mixture was extracted with EtOAc, washed with brine and dried over  $MgSO_4$ . Solvent was removed under reduced pressure and purified by flash chromatography (1:2 EtOAc/Hex) to afford **11** as a white powder (63 mg, 74%).  $^1H$  NMR (300 MHz,  $CDCl_3$ ):  $\delta$  = 7.61 (brs, 1H), 7.53 (d, 1H,  $J$  = 7.8 Hz), 7.38 (t, 2H,  $J$  = 7.5 Hz), 7.17-7.08 (m, 2H), 6.37 (sep, 1H,  $J$  = 6.0 Hz), 5.77 (brs, 0.6 H), 5.51 (brs, 0.4 H) 3.06 (m, 3H); HRMS (ESI):  $m/z$  calculated for  $C_{13}H_{11}F_6N_5O$  [ $M + H^+$ ]: 368.0942. Found: 368.0941.

**Supplementary Table 1. Chemical structures and data for CFTR activation.**

| Code | structure | % Activation (EC <sub>50</sub> , nM) | code | Structure | % Activation (EC <sub>50</sub> , nM) |
|------|-----------|--------------------------------------|------|-----------|--------------------------------------|
| K001 |           | 32                                   | K047 |           | 17                                   |
| K002 |           | 63                                   | K048 |           | 46                                   |
| K003 |           | 16                                   | K049 |           | 28                                   |
| K004 |           | 16                                   | K050 |           | 66                                   |
| K005 |           | 29                                   | K051 |           | 45                                   |

|      |                                                                                     |    |      |                                                                                      |    |
|------|-------------------------------------------------------------------------------------|----|------|--------------------------------------------------------------------------------------|----|
| K006 | 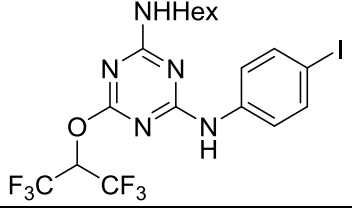   | 16 | K052 |    | 15 |
| K007 |    | 21 | K053 |    | 24 |
| K008 |    | 32 | K054 |    | 14 |
| K009 |   | 57 | K055 |   | 42 |
| K010 |  | 21 | K056 |  | 38 |
| K011 |  | 20 | K057 |  | 28 |

|      |  |    |      |  |             |
|------|--|----|------|--|-------------|
| K012 |  | 19 | K058 |  | 37          |
| K013 |  | 15 | K059 |  | 90<br>(750) |
| K014 |  | 18 | K060 |  | 38          |
| K015 |  | 6  | K061 |  | 31          |
| K016 |  | 19 | K062 |  | 49          |



|      |  |    |      |  |              |
|------|--|----|------|--|--------------|
| K017 |  | 16 | K063 |  | 41           |
| K018 |  | 60 | K064 |  | 40           |
| K019 |  | 28 | K065 |  | 38           |
| K020 |  | 37 | K066 |  | 87<br>(2900) |
| K021 |  | 16 | K067 |  | 49           |

|      |  |    |      |  |              |
|------|--|----|------|--|--------------|
| K022 |  | 53 | K068 |  | 84<br>(4100) |
| K023 |  | 41 | K069 |  | 37           |
| K024 |  | 64 | K070 |  | 28           |
| K025 |  | 19 | K071 |  | 25           |
| K026 |  | 16 | K072 |  | 31           |

|      |  |    |      |  |    |
|------|--|----|------|--|----|
| K027 |  | 20 | K073 |  | 19 |
| K028 |  | 23 | K074 |  | 25 |
| K029 |  | 9  | K075 |  | 32 |
| K030 |  | 16 | K076 |  | 46 |
| K031 |  | 61 | K077 |  | 29 |

|      |  |             |      |  |    |
|------|--|-------------|------|--|----|
| K032 |  | 105<br>(70) | K078 |  | 28 |
| K033 |  | 22          | K079 |  | 40 |
| K034 |  | 73          | K080 |  | 26 |
| K035 |  | 55          | K081 |  | 24 |
| K036 |  | 46          | K082 |  | 28 |

|      |                                                                                     |    |      |                                                                                      |    |
|------|-------------------------------------------------------------------------------------|----|------|--------------------------------------------------------------------------------------|----|
| K037 | 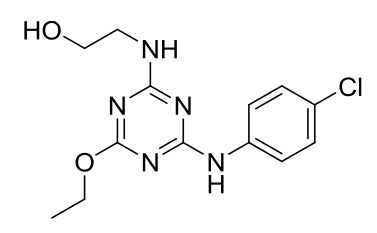   | 36 | K083 |    | 54 |
| K038 |    | 53 | K084 |    | 22 |
| K039 |    | 27 | K085 |    | 25 |
| K040 |   | 17 | K086 |   | 20 |
| K041 |  | 35 | K087 |  | 47 |

|      |  |    |      |  |              |
|------|--|----|------|--|--------------|
| K042 |  | 15 | K088 |  | 33           |
| K043 |  | 19 | K089 |  | 111<br>(250) |
| K044 |  | 55 | K090 |  | 52           |
| K045 |  | 15 | K091 |  | 43           |
| K046 |  | 16 |      |  |              |

% Activation of commercial analogs at 10  $\mu$ M.

Compounds with >80% activation efficacy in plate reader assays were also assayed by short-circuit analysis to determine EC<sub>50</sub> values (in nM).
