# Supplementary material
Source: PubMed Central journal article supplement (PMC5453640)
Supplement: NIHMS860897-supplement-Supplemental_2.pdf [file NIHMS860897-supplement-Supplemental_2.pdf]

| Compound | Chemical Structure (SMILES)                                                      | EC50 (μM) |
|----------|----------------------------------------------------------------------------------|-----------|
| 1        | <chem>CCN(CC)C1=NC(NC2=CC=CC=C2)=NC(OC(C(F)(F)F)C(F)(F)F)=N1</chem>              | 0.24      |
| 6a       | <chem>CCN(CC)C1=NC(NC2=CC=CC(OC=O)=C2)=NC(OC(C(F)(F)F)C(F)(F)F)=N1</chem>        | 0.16      |
| 6b       | <chem>CCN(CC)C1=NC(NC2=CC=CC(F)=C2)=NC(OC(C(F)(F)F)C(F)(F)F)=N1</chem>           | 0.14      |
| 6c       | <chem>CCN(CC)C1=NC(NC2=CC=CC(Cl)=C2)=NC(OC(C(F)(F)F)C(F)(F)F)=N1</chem>          | 2.8       |
| 6d       | <chem>CCN(CC)C1=NC(NC2=CC=CC([N+][O-])=O)=C2)=NC(OC(C(F)(F)F)C(F)(F)F)=N1</chem> | 0.2       |
| 6e       | <chem>CCN(CC)C1=NC(NC2=CC=C(C(O)=O)C=C2)=NC(OC(C(F)(F)F)C(F)(F)F)=N1</chem>      | 0.9       |
| 6f       | <chem>CCN(CC)C1=NC(NC2=CC=C(F)C=C2)=NC(OC(C(F)(F)F)C(F)(F)F)=N1</chem>           | 0.7       |
| 6g       | <chem>CCN(CC)C1=NC(NC2=CC=C([N+][O-])=O)C=C2)=NC(OC(C(F)(F)F)C(F)(F)F)=N1</chem> | 18        |
| 6h       | <chem>CCN(CC)C1=NC(NC2=CC=C3C(NN=C3)=C2)=NC(OC(C(F)(F)F)[C](F)F)=N1.F</chem>     | 0.9       |
| 6i       | <chem>CCN(CC)C1=NC(NC2=CC=C3C(C=NN3)=C2)=NC(OC(C(F)(F)F)[C](F)F)=N1.F</chem>     | 2.8       |
| 6j       | <chem>CCN(CC)C1=NC(NC2=CC=C3C(OC=N3)=C2)=NC(OC(C(F)(F)F)[C](F)F)=N1.F</chem>     | 0.15      |
| 6k       | <chem>CCN(CC)C1=NC(NC2=CC=C3C(SC=N3)=C2)=NC(OC(C(F)(F)F)[C](F)F)=N1.F</chem>     | 0.05      |
| 7a       | <chem>CCN(CC)C1=NC(NC2=CC=CC=C2)=NC(OCC(F)(F)C(F)F)=N1</chem>                    | 2         |
| 7b       | <chem>CCN(CC)C1=NC(NC2=CC=CC(OC=O)=C2)=NC(OCC(F)(F)C(F)F)=N1</chem>              | 0.5       |
| 7c       | <chem>CCN(CC)C1=NC(NC2=CC=CC(F)=C2)=NC(OCC(F)(F)C(F)F)=N1</chem>                 | 1.6       |
| 7d       | <chem>CCN(CC)C1=NC(NC2=CC=CC(Cl)=C2)=NC(OCC(F)(F)C(F)F)=N1</chem>                | 5.4       |
| 7e       | <chem>CCN(CC)C1=NC(NC2=CC=CC([N+][O-])=O)=C2)=NC(OCC(F)(F)C(F)F)=N1</chem>       | 1.2       |
| 7f       | <chem>CCN(CC)C1=NC(NC2=CC=C(C(O)=O)C=C2)=NC(OCC(F)(F)C(F)F)=N1</chem>            | 2.5       |
| 7g       | <chem>CCN(CC)C1=NC(NC2=CC=C(F)C=C2)=NC(OCC(F)(F)C(F)F)=N1</chem>                 | 4.8       |
| 11       | <chem>CNC1=NC(NC2=CC=CC=C2)=NC(OC(C(F)(F)F)C(F)(F)F)=N1</chem>                   | 0.12      |
| 12       | <chem>CNC1=NC(NC2=CC=CC=C2)=NC(OCC(F)(F)C(F)F)=N1</chem>                         | 0.04      |
